# Supplementary material
Source: HighWire-hosted journal article supplement (http://molpharm.aspetjournals.org/highwire/filestream/77274/field_highwire_adjunct_files/2/Scholten_Supp-info_revised_88633.pdf)
Supplement: Scholten_Supp-info_revised_88633.pdf [file Scholten_Supp-info_revised_88633.pdf]

Title: Identification of overlapping, but differential binding sites for the high-affinity CXCR3 antagonists NBI-74330 and VUF11211

Authors: Danny J. Scholten, Luc Roumen, Maikel Wijtmans, Marlies C.A. Verkade-Vreeker, Hans Custers, Michael Lai, Daniela de Hooge, Merixell Canals, Iwan J.P. de Esch, Martine J. Smit, Chris de Graaf, and Rob Leurs

Journal: Molecular Pharmacology



## Supplemental Methods: Synthesis and chemical analysis of VUF11211

### Approach

The synthesis of VUF11211 was carried out according to the general procedures patented by Merck (see patent citation in main text). The scheme below depicts the approach.

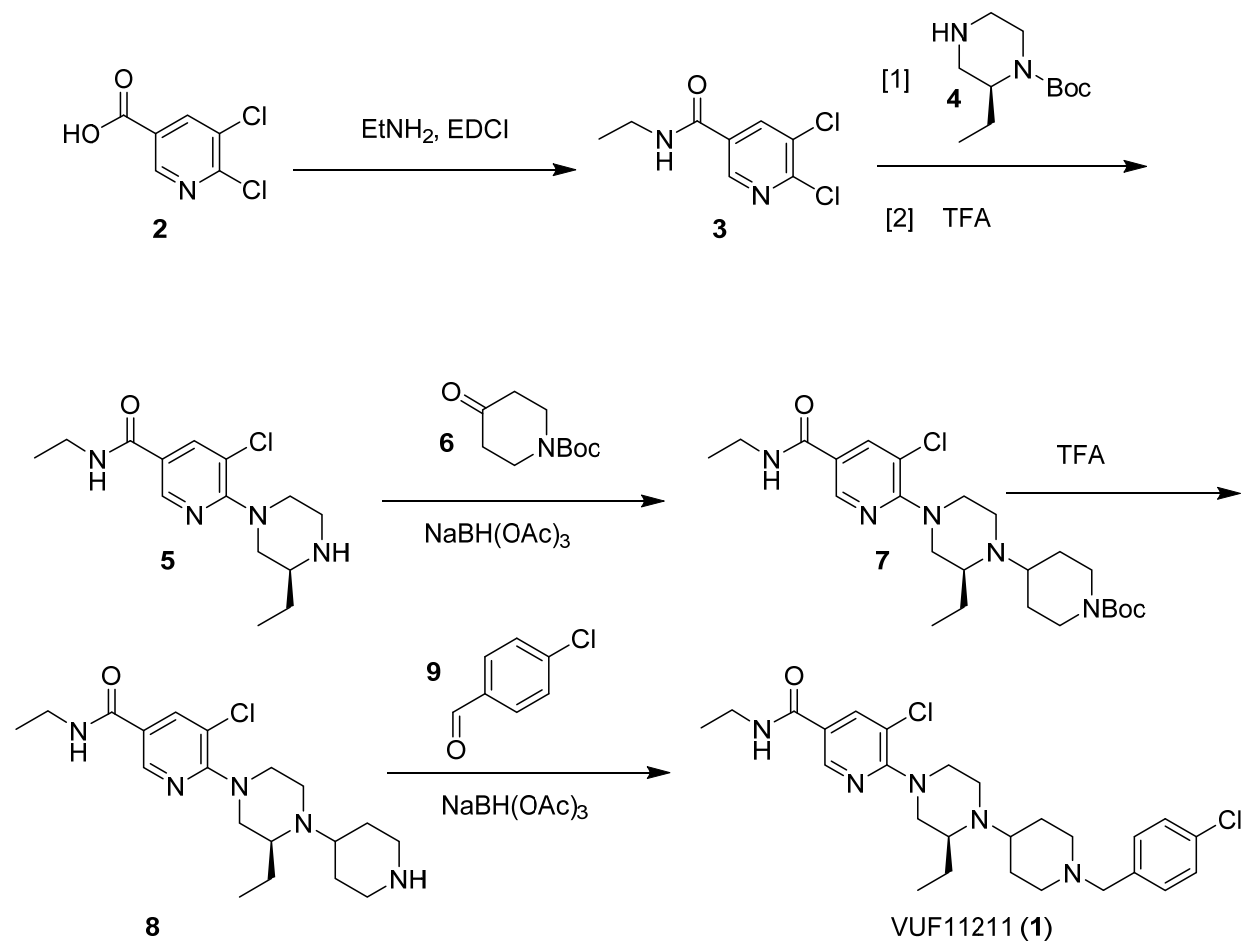

Overview of synthetic approach

### General synthetic remarks

THF, toluene and CH<sub>2</sub>Cl<sub>2</sub> were distilled freshly from CaH<sub>2</sub>. All other solvents were used as received. Unless indicated otherwise, all reactions were carried out under an inert nitrogen atmosphere. TLC analyses were performed with Merck F254 Alumina Silica Plates using UV visualization or staining. Microwave reactions were carried out on a Biotage® Initiator. Column purifications were carried out using the Biotage® equipment. All HRMS spectra were recorded on Bruker micrOTOF MS using ESI in positive ion mode. The <sup>1</sup>H-, <sup>13</sup>C- and 2D-NMR spectra were recorded on a Bruker 250, 400 or 500 MHz spectrometer. Systematic names for molecules were generated using ChemBioDraw Ultra 12. Chemical purities were measured with the aid of analytical LC-MS using a Shimadzu LC-20AD liquid chromatograph pump system with a Shimadzu SPD-M20A diode array detector with the MS detection performed with a Shimadzu LCMS-2010EV mass spectrometer. The column used was an Xbridge (C18) 5 μm column (50 mm × 4.6 mm). Elution program: solvent B (MeCN/0.1% formic acid) and solvent A (water/0.1% formic acid), flow rate of 1.0 mL/min, start 5% B, linear gradient to 90% B in 4.5 min, then 1.5 min at 90% B, then linear gradient to 5% B in 0.5 min, then 1.5 min at 5% B, total run time of 8 min. Compound purities were calculated as the percentage peak area of the analyzed compound by UV detection at (unless mentioned otherwise) 230 nm. Unless reported otherwise, all compounds have a purity ≥ 95 % as measured by these LC-MS analyses. Optical purities were measured with the aid of chiral chromatography. The column used was a Chiralcel OD-H 250x4.6 mm. The eluent used was *n*-hexane (+0.05% diethylamine)/2-propanol = 90/10 with a flow rate of 0.7 mL/min at 40 °C. The run time was 30 min and UV detection was conducted at 211 nm. Specific optical rotations were measured with a sodium lamp and are reported as follows:  $[\alpha]_D^{23}$  (c = g/100 mL, solvent). *Tert*-butyl (S)-2-ethylpiperazine-1-carboxylate (**4**) was from Porse Fine Chemical (> 98 % e.e). Its optical rotation  $[\alpha]_D^{23}$  (c = 4.79 g/100 mL, MeOH) was +41.7°. Racemic *tert*-butyl (S)-2-ethylpiperazine-1-carboxylate hydrochloride (**rac-4.HCl**) was from Acesys Pharmatech. As expected, its optical rotation measured under similar conditions as with **4** amounted to zero. All other chemicals were from Sigma-Aldrich.

## Synthetic procedures

### 5,6-Dichloro-N-ethylnicotinamide (3).

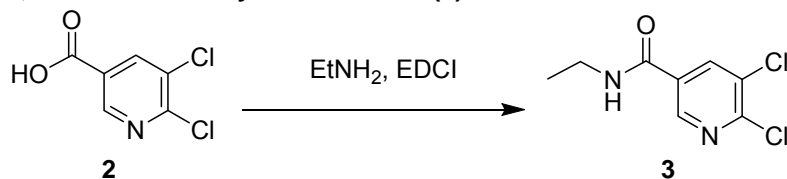

Acid **2** (10.0 g, 52.1 mmol) and EtNH<sub>2</sub>.HCl (8.5 g, 104 mmol) were dissolved in DMF (200 mL, dried over molsieves). EDCI (10.0 g, 52.2 mmol) and Et<sub>3</sub>N (15.0 mL, 108 mmol) were added and the mixture was stirred overnight at room temperature. DMF was removed under reduced pressure. The residue was dissolved in DCM (200 mL) and washed with 1.0 M aq. Na<sub>2</sub>CO<sub>3</sub> (200 mL) and water (200 mL). The organic layer was dried over Na<sub>2</sub>SO<sub>4</sub>, filtered and concentrated under vacuum. Column chromatography was performed (eluent: EtOAc/heptane = 1/1) to give the product as a white solid (5.35 gr, 47 %).

LC-MS purity: 98+ %. <sup>1</sup>H-NMR (CDCl<sub>3</sub>, 400 MHz) δ 8.61 (d, 1H, J=2.1 Hz), 8.19 (d, 1H, J=2.1 Hz), 6.23-6.12 (br, 1H), 3.51 (dq, 2H, J<sub>1</sub>=7.3 Hz), 1.27 (t, 3H, J=7.3 Hz).

### (S)-5-Chloro-N-ethyl-6-(3-ethylpiperazin-1-yl)nicotinamide (5).

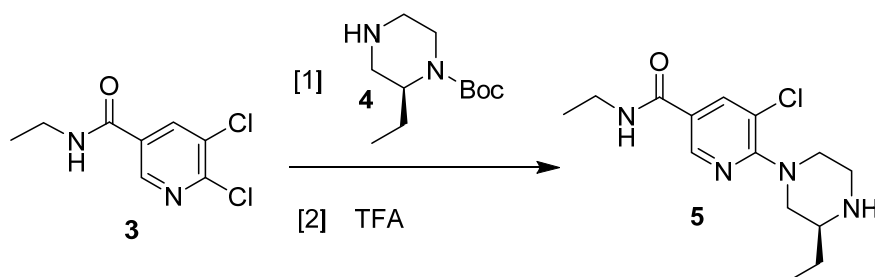

Chloride **3** (5.35 g, 24.4 mmol) was dissolved in DMF (50 mL, dried over molsieves). Piperazine **4** (5.0 g, 23.3 mmol) was added, followed by the addition of K<sub>2</sub>CO<sub>3</sub> (8.0 gr, 58 mmol). The mixture was stirred overnight at 80°C. The DMF was evaporated under reduced pressure. The residue was dissolved in DCM (100 mL) and washed with water (50 mL). The organic layer was dried over Na<sub>2</sub>SO<sub>4</sub>, filtered and concentrated under vacuum to give crude Boc-protected product. This was dissolved in DCM (50 mL) and CF<sub>3</sub>COOH (5 mL) was added dropwise. The mixture was stirred for 1 hour at room temperature and subsequently concentrated under vacuum. The residue was dissolved in DCM (25 mL) and washed with 1.0 M aq. NaOH (25 mL) and water (25 mL). The organic layer was dried over Na<sub>2</sub>SO<sub>4</sub>, filtered and concentrated under vacuum. Column chromatography (gradient: EtOAc/Et<sub>3</sub>N 99/1 to EtOAc/MeOH/Et<sub>3</sub>N 80/20/1) afforded the product as a white solid (3.35 g, 46 %).

LC-MS purity: 98+ %. <sup>1</sup>H-NMR (CDCl<sub>3</sub>, 400 MHz) δ 8.48 (d, 1H, J=2.1 Hz), 7.97 (d, 1H, J=2.1 Hz), 6.09 (br t, 1H), 4.00-3.89 (m, 2H), 3.48 (dq, 2H, J<sub>1</sub>=7.3 Hz), 3.11-2.89 (m, 3H), 2.82-2.72 (m, 1H), 2.58 (dd, 1H, J<sub>1</sub>=12.4 Hz, J<sub>2</sub>=10.0 Hz), 1.52-1.35 (m, 2H), 1.23 (t, 3H, J=7.3 Hz), 0.97 (t, 3H, J=7.5 Hz).

### Tert-butyl (S)-4-(4-(3-chloro-5-(ethylcarbamoyl)pyridin-2-yl)-2-ethylpiperazin-1-yl)piperidine-1-carboxylate (7).

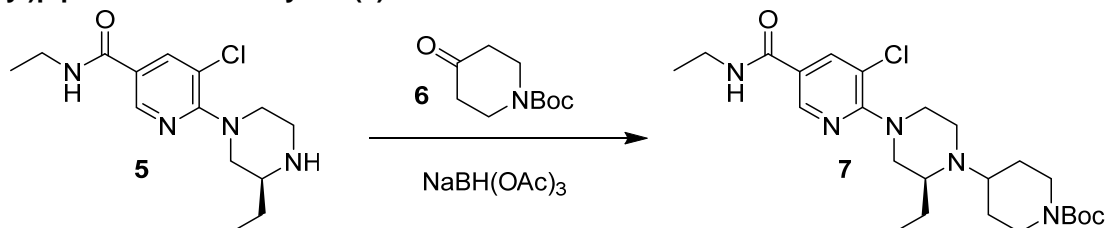

Amine **5** (3.30 g, 11.1 mmol) was dissolved in dry DCM (75 mL). Piperidone **6** (4.4 g, 22.2 mmol) was added stepwise, followed by the addition of NaBH(OAc)<sub>3</sub> (4.7 g, 22.2 mmol). The mixture was stirred for 16 hours at room temperature. LC-MS inspection of an aliquot revealed incomplete conversion. Therefore, more piperidone **6** (2.0 g, 10.0 mmol) and

NaBH(OAc)<sub>3</sub> (2.0 g, 9.4 mmol) were added. Stirring was continued for another 24 hours at room temperature. Aq. 1.0 M NaOH (75 mL) was added to quench the reaction. The organic layer was collected and the water layer was extracted once with DCM (75 mL). The combined organic layers were dried over Na<sub>2</sub>SO<sub>4</sub>, filtered and concentrated under vacuum. Column chromatography (eluent: EtOAc) afforded the product as a white solid (4.35 g, 81 %).

LC-MS purity: 98+ %. <sup>1</sup>H-NMR (CDCl<sub>3</sub>, 400 MHz) δ 8.47 (d, 1H, J=2.1 Hz), 7.97 (d, 1H, J=2.1 Hz), 5.94 (br t, 1H), 4.22-4.08 (br, 2H), 3.75-3.64 (m, 2H), 3.52-3.44 (m, 2H), 3.31-3.22 (m, 1H), 3.22-3.12 (m, 1H), 2.91-2.59 (m, 6H), 1.75-1.65 (m, 2H), 1.65-1.53 (m, 3H), 1.48-1.33 (m, 1H), 1.46 (s, 9H), 1.24 (t, 3H), 0.94 (t, 3H, J=7.4 Hz).

**(S)-5-Chloro-N-ethyl-6-(3-ethyl-4-(piperidin-4-yl)piperazin-1-yl)nicotinamide (8).**

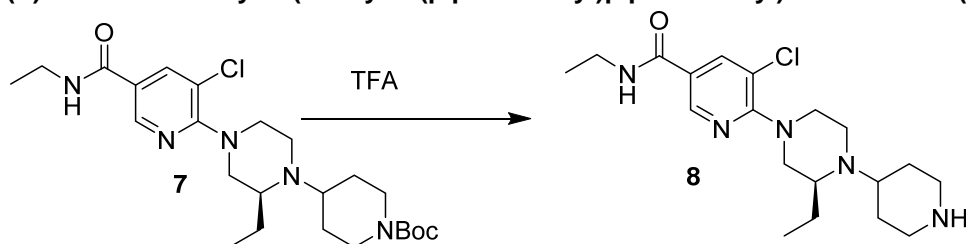

Boc-protected amine **7** (4.35 g, 9.1 mmol) was dissolved in DCM (50 mL). CF<sub>3</sub>COOH (5 mL) was added drop wise. The mixture was stirred for 1 hour at room temperature and subsequently concentrated under vacuum. The residue was dissolved in DCM (25 mL) and washed with 1.0 M aq. NaOH (25 mL) and water (25 mL). The organic layer was dried over Na<sub>2</sub>SO<sub>4</sub>, filtered and concentrated under vacuum. Column chromatography (gradient: EtOAc/Et<sub>3</sub>N 99/1 to EtOAc/MeOH/Et<sub>3</sub>N 80/20/1) gave the product as a yellow foam (2.3 g, 67 %).

LC-MS purity: 98+ %. <sup>1</sup>H-NMR (CDCl<sub>3</sub>, 400 MHz) δ 8.47 (d, 1H, J=2.1 Hz), 7.97 (d, 1H, J=2.1 Hz), 5.97 (br t, 1H, J=5.0 Hz), 3.77-3.68 (m, 2H), 3.48 (dq, 2H, J<sub>1</sub>=7.3 Hz), 3.29-3.23 (m, 1H), 3.22-3.11 (m, 3H), 2.91-2.80 (m, 2H), 2.78-2.71 (m, 1H), 2.71-2.55 (m, 3H), 1.79-1.70 (m, 2H), 1.68-1.50 (m, 3H), 1.48-1.36 (m, 1H), 1.24 (t, 3H, J=7.1 Hz), 0.93 (t, 3H, J=7.5 Hz).

**(S)-5-Chloro-6-(4-(1-(4-chlorobenzyl)piperidin-4-yl)-3-ethylpiperazin-1-yl)-N-ethylnicotinamide (1, VUF11211).**

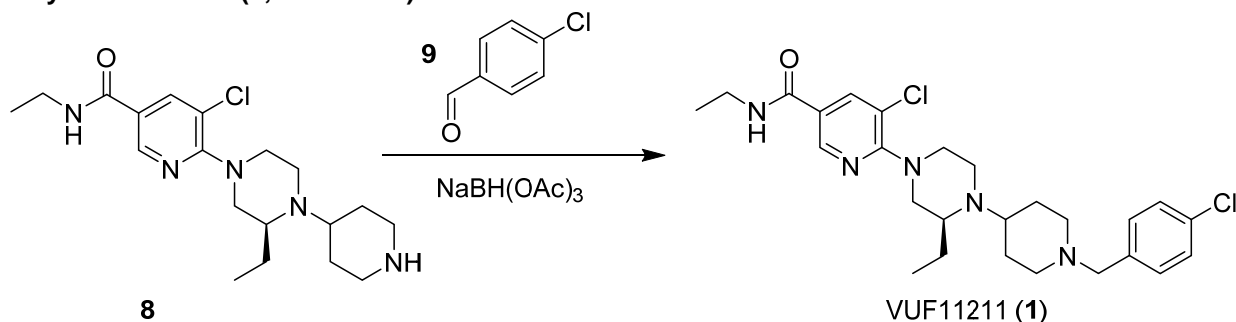

Amine **8** (800 mg, 2.1 mmol) was dissolved in DCM (20 mL). Aldehyde **9** (300 mg, 2.1 mmol) was added, followed by the addition of NaBH(OAc)<sub>3</sub> (1.0 g, 4.7 mmol). The reaction mixture was stirred overnight at room temperature. The mixture was quenched with 1.0 M aq. NaOH (20 mL). The organic layer was collected, washed with water (20 mL), dried over Na<sub>2</sub>SO<sub>4</sub>, filtered and concentrated under vacuum. Column chromatography (eluent: EtOAc / MeOH / TEA = 100/0/1 to 80/20/1) afforded an oil. The obtained oil was crystallized from hot EtOAc to give the product as a white solid (550 mg, 52 %). The compound tends to retain traces of EtOAc (1-5 mole %) even after extensive drying.

LC-MS purity: 99+ %. Chiral LC purity: one peak at 15.22 min (co-injection with *rac*-**1** confirms identity of peak). HR-MS: [M+H]<sup>+</sup> C<sub>26</sub>H<sub>36</sub>Cl<sub>2</sub>N<sub>5</sub>O<sup>+</sup> calc: 504.2291, found: 504.2269. <sup>1</sup>H-NMR (DMSO-d<sub>6</sub>, 500 MHz) δ 8.60 (d, 1H, J=2.1 Hz), 8.47 (t, 1H, J=5.5 Hz), 8.12 (d, 1H, J=2.1 Hz), 7.36 (d, 2H, J=8.5 Hz), 7.30 (d, 2H, J=8.5 Hz), 3.56-3.49 (m, 2H), 3.42 (app s, 2H),

3.24 (dq, 2H, J1=7.1 Hz), 3.20-3.13 (m, 1H), 3.13-3.06 (m, 1H), 2.85-2.77 (m, 3H), 2.70-2.64 (m, 1H), 2.64-2.60 (m, 1H), 2.60-2.53 (m, 1H), 2.01-1.88 (m, 2H), 1.66-1.55 (m, 3H), 1.55-1.46 (m, 2H), 1.37 (dq, 1H, J1=11.8 Hz), 1.10 (t, 3H, J=7.1 Hz), 0.84 (t, 3H, J=7.4 Hz).

<sup>13</sup>C-APT-NMR (DMSO-d<sub>6</sub> (↑), 125 MHz) δ 163.6 (↑), 159.0 (↑), 145.8 (↓), 138.2 (↑), 138.2 (↓), 131.8 (↑), 130.9 (↓), 128.6 (↓), 124.2 (↑), 119.7 (↑), 61.6 (↑), 56.7 (↓), 55.5 (↓), 53.4 (↑), 52.9 (↑), 52.1 (↑), 49.2 (↑), 44.2 (↑), 34.5 (↑), 30.7 (↑), 25.4 (↑), 20.4 (↑), 15.2 (↓), 10.4 (↓). Hardcopies of selected spectra are available at the end of this Supporting Information.

2D-NMR spectroscopy: From the APT spectrum it became clear that the piperidine CH<sub>2</sub> groups in compound **1** are non-equivalent (making the total amount of expected aliphatic carbons to be 14), perhaps due to severely restricted rotation around N-CH bond (low level force field calculations using MOE software and MMF94x protocol suggest a C-N rotation barrier of about 16 kcal/mole). Heating the NMR sample to 373 K had little effect. Non-equivalency of the piperidine CH<sub>2</sub> groups was proven by 2D NMR spectroscopy. Key evidence involves [1] two HMBC couplings of equal intensity between the benzyl CH<sub>2</sub> protons and two different aliphatic CH<sub>2</sub> carbons (colored green and red) [2] HSQC coupling of these two CH<sub>2</sub> aliphatics carbons with four different protons (termed H<sub>1</sub> to H<sub>4</sub>).

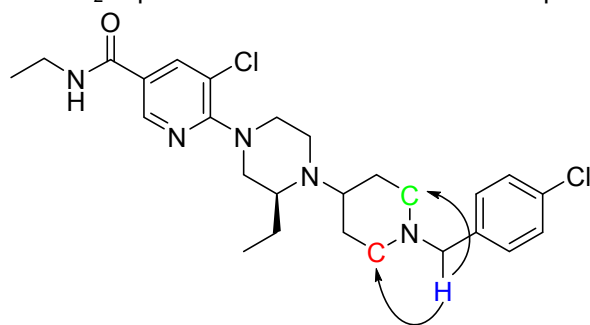

Key HMBC couplings

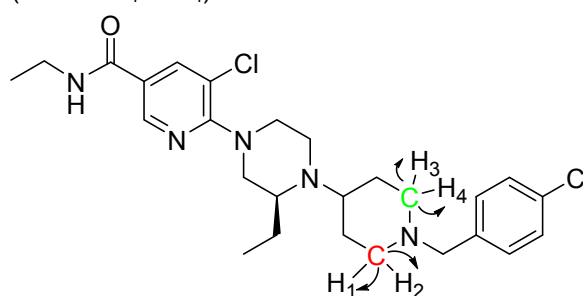

Key HSQC couplings

**rac-5-Chloro-6-(4-(1-(4-chlorobenzyl)piperidin-4-yl)-3-ethylpiperazin-1-yl)-N-ethylnicotinamide (rac-1, rac-VUF11211).**

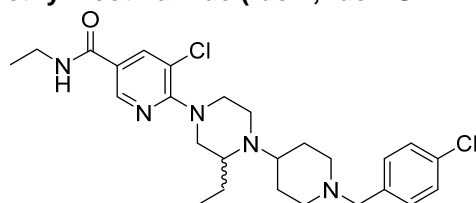

rac-VUF11211 (**rac-1**)

This compound was prepared using the same route as described for VUF11211 (**1**), but using **rac-4.HCl** instead of enantiopure **4**. As expected, features of **rac-1** from NMR and achiral LC-MS analyses are identical to those of enantiopure **1**.

LC-MS purity: 98+ %. LR-MS: [M+H]<sup>+</sup> C<sub>26</sub>H<sub>36</sub>Cl<sub>2</sub>N<sub>5</sub>O<sup>+</sup> calc: 504.2, found: 504.1. Chiral LC purity: two peaks of equal area at 13.84 min and 15.32 min.

Exemplary spectra and chromatograms

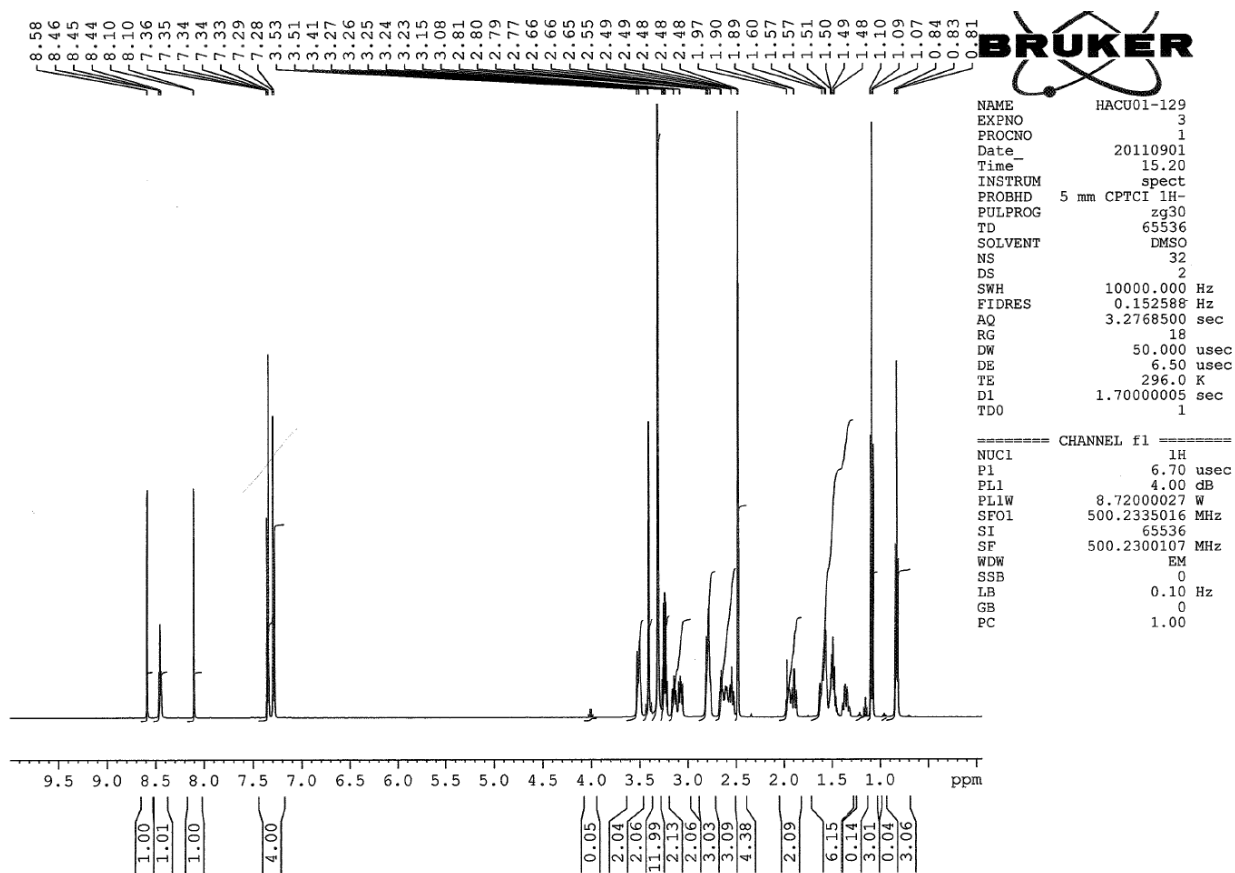

<sup>1</sup>H-NMR spectrum of **1** in DMSO-d<sub>6</sub>. A trace of EtOAc (2.5 mole %) is visible.



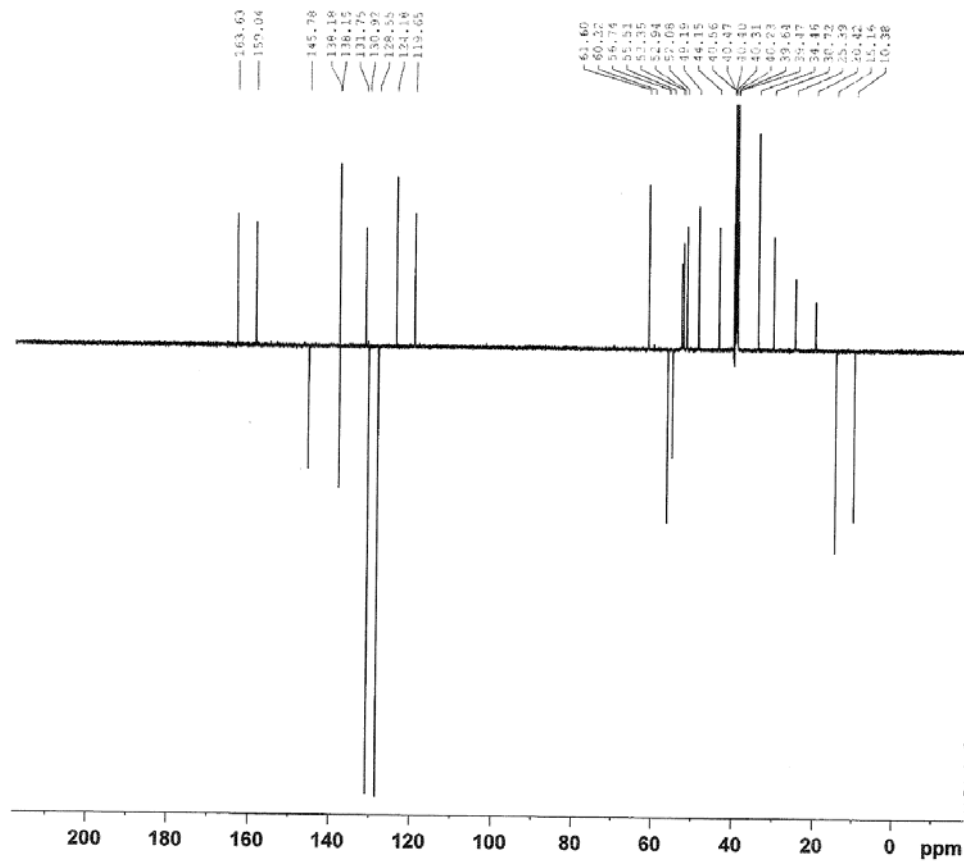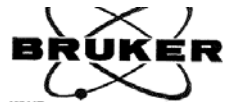

```

NAME      HACU01-129
EXPNO     2
PROCNO    1
Date_     20110830
Time      13.27
INSTRUM   spect
PROBHD    5 mm CPTCI 1H-
PULPROG   jmod
TD         65536
SOLVENT   DMSO
NS         1024
DS         4
SWH        29761.904 Hz
FIDRES     0.454131 Hz
AQ         1.1010548 sec
RG         2050
DW         16.800 usec
DE         6.50 usec
TE         295.9 K
CNST2     145.000000
CNST11    1.0000000
D1         2.0000000 sec
D20        0.00689655 sec
TD0        1

===== CHANNEL f1 =====
NUC1       13C
P1         11.20 usec
P2         22.40 usec
PL1        -2.00 dB
PL1W       88.77790070 W
SF01       125.7955118 MHz

===== CHANNEL f2 =====
CPDPRG2   waltz16
NUC2       1H
PCPD2     -80.00 usec
PL2        4.00 dB
PL12       25.28 dB
PL2W       8.72000027 W
PL12W     0.06494062 W
SF02       500.2320009 MHz
SI         32768
SF         125.7829340 MHz
WDW        EM
SSB        0
LB         1.00 Hz
GB         0
PC         1.40
  
```

<sup>13</sup>C-APT-NMR spectrum of **1** in DMSO-d<sub>6</sub>.

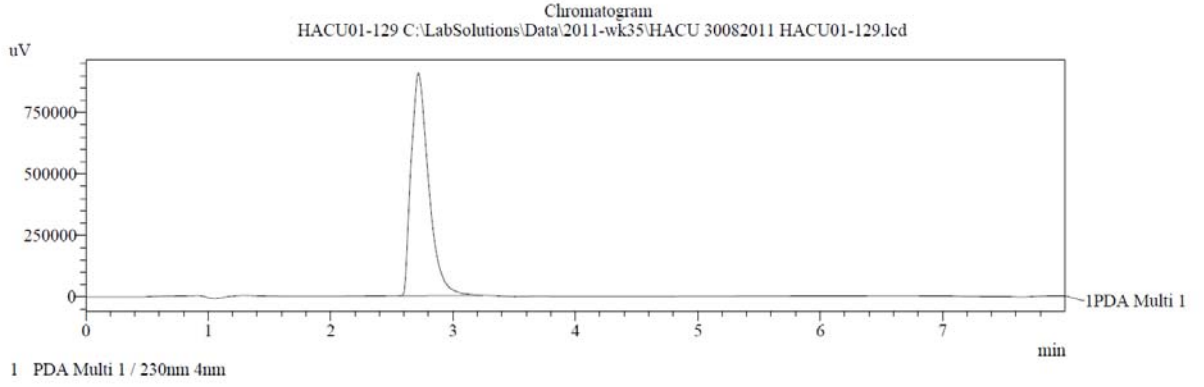

PeakTable

| Peak# | Name | Ret. Time | Area    | Area %  |
|-------|------|-----------|---------|---------|
| 1     |      | 2.713     | 8980850 | 100.000 |

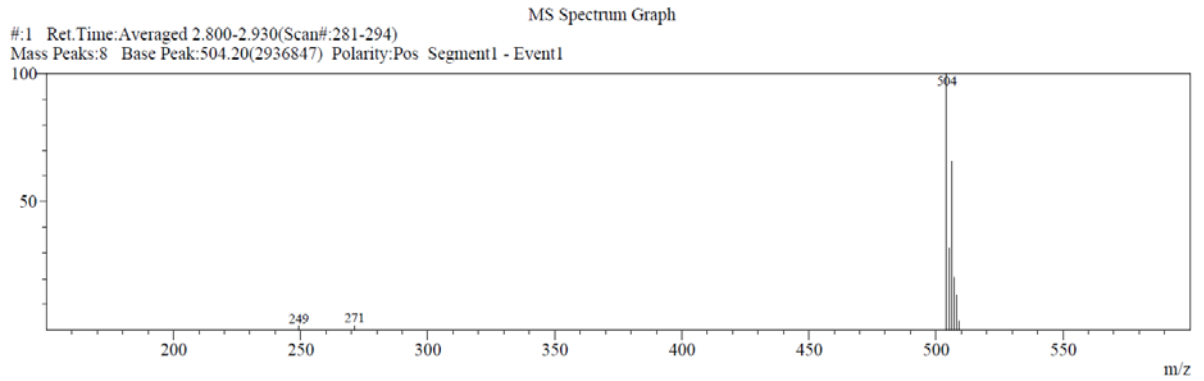

MS Spectrum Table

#1 Ret.Time:  
BG Mode:None  
Mass Peaks:8 Base Peak:504.20(2936847) Polarity:Pos Segment1 - Event

| # | m/z    | Abs.Inten. | Rel.Inten. | Charge | Polarity | Monoisotopic | # | m/z    | Abs.Inten. | Rel.Inten. | Charge | Polarity | Monoisotopic |
|---|--------|------------|------------|--------|----------|--------------|---|--------|------------|------------|--------|----------|--------------|
| 1 | 249.15 | 46502      | 1.58       |        |          |              | 5 | 506.20 | 1942501    | 66.14      |        |          |              |
| 2 | 271.10 | 51416      | 1.75       |        |          |              | 6 | 507.20 | 597522     | 20.35      |        |          |              |
| 3 | 504.20 | 2936847    | 100.00     |        |          |              | 7 | 508.20 | 401205     | 13.66      |        |          |              |
| 4 | 505.20 | 930253     | 31.68      |        |          |              | 8 | 509.25 | 103031     | 3.51       |        |          |              |

LC-MS chromatogram of 1.

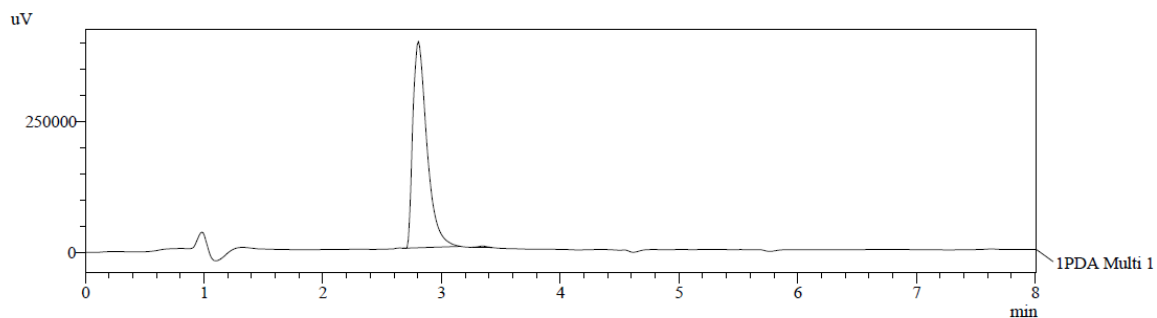

1 PDA Multi 1 / 230nm 4nm

PeakTable

PDA Ch1 230nm 4nm

| Peak# | Name | Ret. Time | Area    | Area % |
|-------|------|-----------|---------|--------|
| 1     |      | 2.799     | 3249655 | 99.595 |
| 2     |      | 3.340     | 13215   | 0.405  |

MS Spectrum Graph

#1 Ret. Time: Averaged 2.880-2.980(Scan#:289-299)

Mass Peaks:6 Base Peak:504.05(1155803) Polarity:Pos Segment1 - Event1

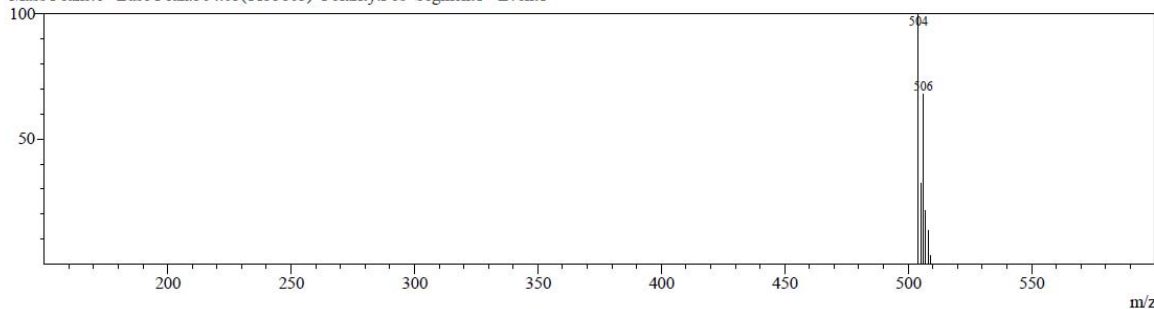

MS Spectrum Table

#1 Ret. Time:

BG Mode:None

Mass Peaks:6 Base Peak:504.05(1155803) Polarity:Pos Segment1 - Event

| # | m/z    | Abs.Inten. | Rel.Inten. | Charge | Polarity | Monoisotopic | # | m/z    | Abs.Inten. | Rel.Inten. | Charge | Polarity | Monoisotopic |
|---|--------|------------|------------|--------|----------|--------------|---|--------|------------|------------|--------|----------|--------------|
| 1 | 504.05 | 1155803    | 100.00     |        |          |              | 4 | 507.05 | 245028     | 21.20      |        |          |              |
| 2 | 505.05 | 374091     | 32.37      |        |          |              | 5 | 508.10 | 154922     | 13.40      |        |          |              |
| 3 | 506.05 | 785607     | 67.97      |        |          |              | 6 | 509.05 | 36308      | 3.14       |        |          |              |

LC-MS chromatogram of co-injected equimolar amounts of enantiopure **1** and *rac*-**1**.

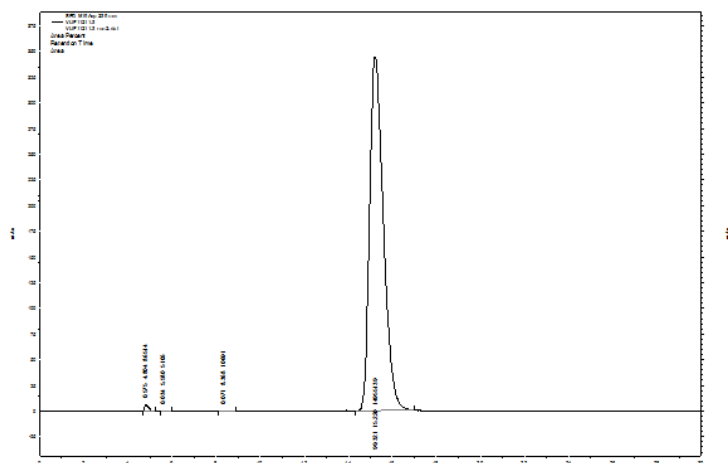

Chiral LC chromatogram of enantiopure **1**.

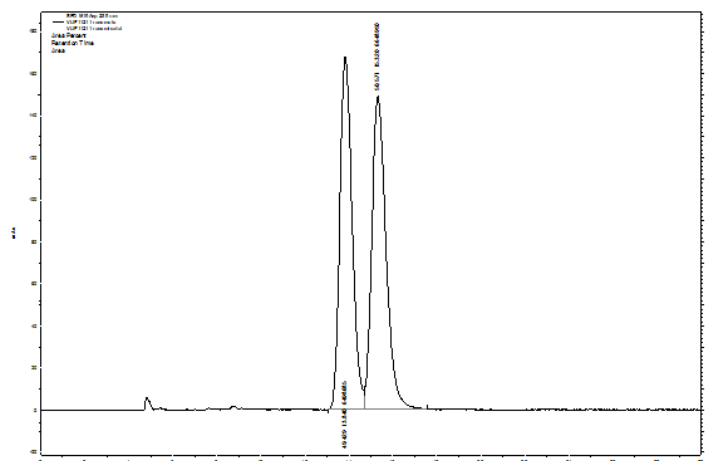

Chiral LC chromatogram of *rac-1*.

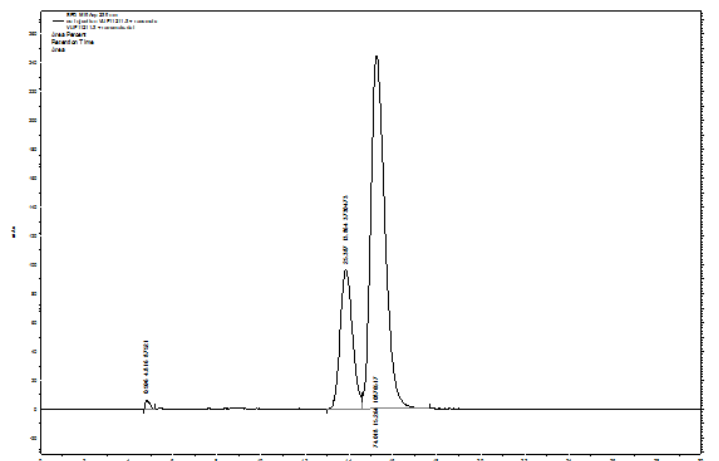

Chiral LC chromatogram of co-injected equimolar amounts of enantiopure **1** and *rac-1*.
